# Supplementary material
Source: ML conference proceedings conference paper supplement (https://openaccess.thecvf.com/content/CVPR2022/html/Thyagharajan_Segment-Fusion_Hierarchical_Context_CVPR_2022_paper.html)
Supplement: Supplementary file 1 [file Thyagharajan_Segment-Fusion_Hierarchical_Context_CVPR_2022_supplemental.pdf]

# SegmentFusion: Hierarchical Context Fusion for Robust 3D Semantic Segmentation (Supplementary Material)

Anirud Thyagarajan<sup>1</sup>, Benjamin Ummenhofer<sup>2</sup>, Prashant Laddha<sup>1</sup>, Om Ji Omer<sup>1</sup>, Sreenivas Subramoney<sup>1</sup>  
<sup>1</sup>Processor Architecture Research Lab India, <sup>2</sup>Autonomous Agents Lab Germany}, Intel Labs

## 1. Network Architecture

Below is an example of the network architecture. The network architecture is composed of a stack ( $N = 2$ ) of encoder blocks, followed by a final fully connected layer. Each encoder is composed of a scaled dot product attention block, (Figure 1 shows the first of such blocks).  $u$  and  $v$  capture segmentwise features in the projected space, and the attention  $S(u, v)$  computes the interactions of features across segments. We constrain the interactions to flow only between spatially connected segments, which is performed by employing a Hadamard product with the adjacency matrix  $A$ . This ensures that the error gradient flows through only relevant edges. To maintain regular gradient flow across the  $N$  blocks, we employ skip connections and propagate features onto the next encoder block. The number of hidden nodes  $K$  in each FC layer is 256, with group norm parameter as a group of 8 channels.

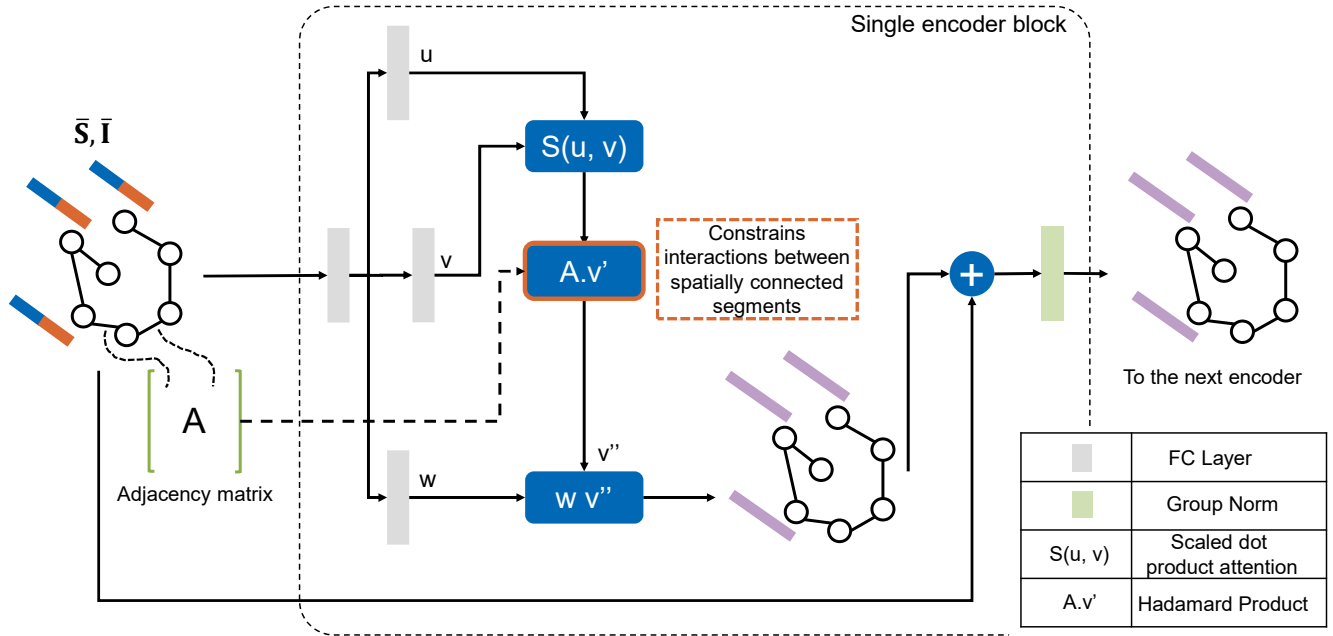

Figure 1. Description of the components of the first encoder block in the Segment-Fusion network architecture.

## 2. Training Setup

As part of data augmentation, we introduced random dropping of nodes in the graph, along with randomly resetting some spatial connections (by setting entries of  $A$  to 0) to make the fusion decisions more robust. The proposed Segment-Fusion network is extremely light-weight (consists of only about  $0.5M$  parameters for the above  $N = 2, K = 256$  configuration.) and can be trained on either a GPU or CPU. We trained the network on a Intel(R) i7-8700K CPU with 16 GB RAM.

### 3. Visualizations

Figures 2,3 and 4 illustrate additional visualizations of the impact of using Segment-Fusion on previous semantic estimators (MinkowskiNet [1], PointConv [4], SparseConvNet [2]) on the ScanNet dataset.

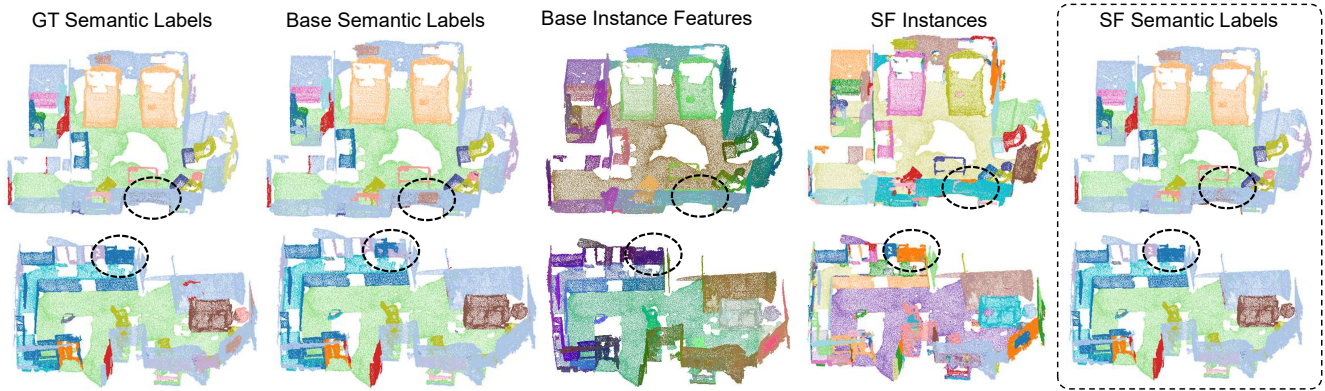

Figure 2. Qualitative results of Segment-Fusion on some sample point clouds of the ScanNet validation set using the MinkowskiNet semantic backbone.

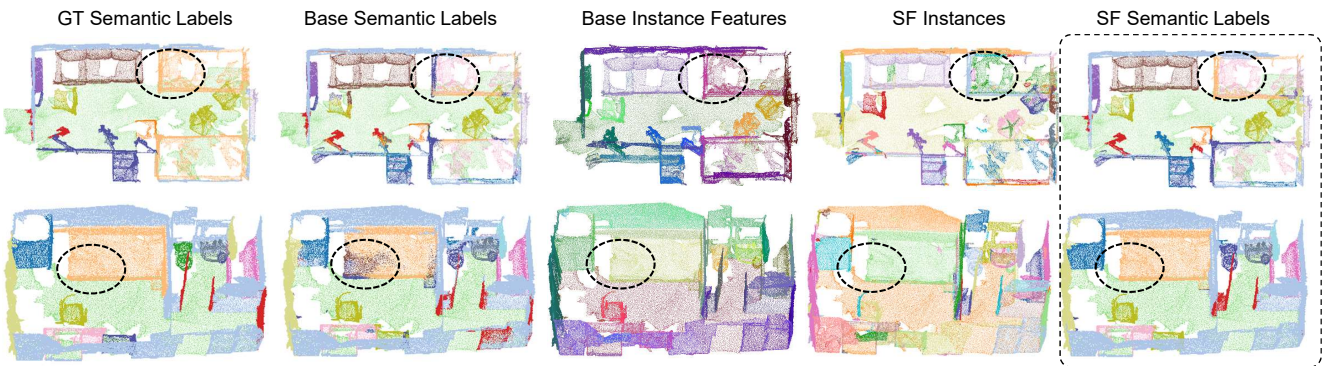

Figure 3. Qualitative results of Segment-Fusion on some sample point clouds of the ScanNet validation set using the PointConv semantic backbone.

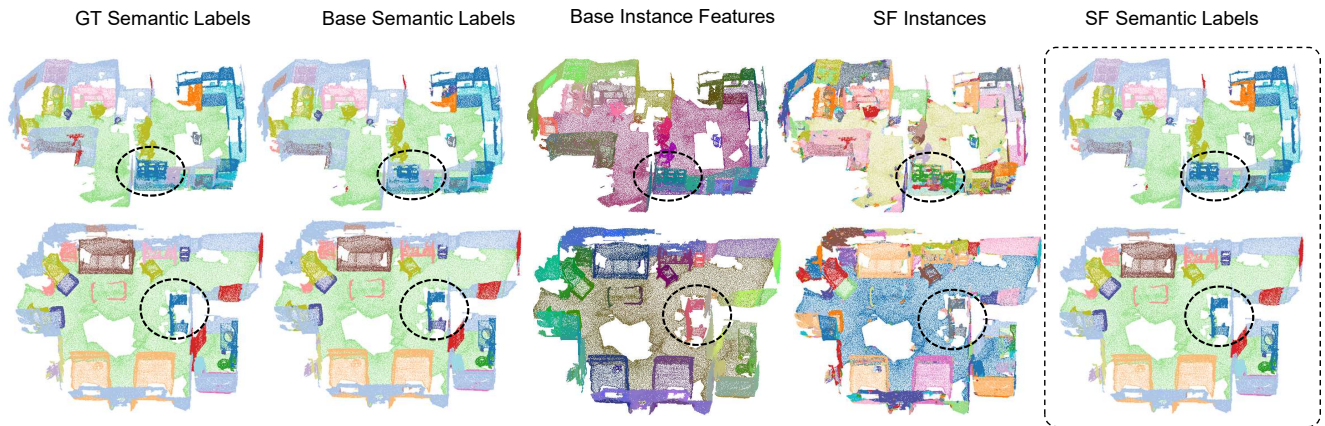

Figure 4. Qualitative results of Segment-Fusion on some sample point clouds of the ScanNet validation set using the SparseConvNet semantic backbone.

Table 1. Performance impact (mIoU) of Segment-Fusion on state-of-the-art semantic segmentation backbones on the ScanNet.

| Model              | Set | wall | floor | cabinet | bed  | chair | sofa | table | door | window | bookshelf | picture | counter | desk | curtain | fridge | shower | toilet | sink | bathub | furniture | mean        |
|--------------------|-----|------|-------|---------|------|-------|------|-------|------|--------|-----------|---------|---------|------|---------|--------|--------|--------|------|--------|-----------|-------------|
| SparseConvNet      | val | 82.4 | 94.8  | 58.0    | 77.2 | 88.5  | 78.4 | 68.1  | 58.3 | 58.7   | 70.1      | 29.4    | 61.9    | 56.7 | 62.3    | 46.6   | 61.5   | 91.2   | 63.7 | 84.0   | 50.3      | 67.1        |
| SparseConvNet + SF | val | 85.3 | 97.1  | 61.9    | 79.5 | 91.6  | 82.1 | 72.3  | 61.4 | 61.0   | 71.6      | 36.1    | 71.0    | 61.7 | 65.8    | 47.1   | 69.9   | 95.5   | 73.8 | 92.3   | 54.0      | <b>71.5</b> |
| PointConv          | val | 74.1 | 94.7  | 46.9    | 70.0 | 83.0  | 70.0 | 64.9  | 32.1 | 46.7   | 68.4      | 11.7    | 56.6    | 52.4 | 58.2    | 36.6   | 46.8   | 83.2   | 58.0 | 77.3   | 34.6      | 58.3        |
| PointConv + SF     | val | 78.6 | 97.3  | 50.7    | 78.0 | 87.6  | 76.2 | 68.0  | 36.0 | 49.3   | 75.1      | 13.3    | 64.2    | 59.9 | 62.9    | 38.1   | 54.1   | 89.9   | 63.6 | 90.5   | 38.2      | <b>63.6</b> |
| MinkNet42          | val | 84.3 | 95.1  | 63.3    | 78.9 | 91.5  | 87.7 | 74.4  | 60.2 | 65.0   | 80.1      | 24.9    | 65.1    | 65.8 | 78.1    | 55.4   | 69.9   | 92.2   | 69.1 | 86.4   | 61.0      | 72.4        |
| MinkNet42 + SF     | val | 86.7 | 97.3  | 65.9    | 80.0 | 93.9  | 90.0 | 77.0  | 63.6 | 66.4   | 82.9      | 26.5    | 68.9    | 68.7 | 80.7    | 55.7   | 72.8   | 95.4   | 76.0 | 91.7   | 64.5      | <b>75.2</b> |

#### 4. ScanNet Validation Set Evaluation

In Table 1, we present results of using Segment-Fusion on a variety of semantic backbones (MinkowskiNet [1], PointConv [4], SparseConvNet [2]) on the ScanNet validation set, supplemented with an instance backbone trained with the losses proposed in Occuseg [3]. Similar to the test set, we observe significant improvements of 4.4%, 5.1% and 2.8% respectively in mIoU scores (and gains in individual class scores). Thus, we observe that the improvements provided by Segment-Fusion do not depend specifically on the choice of the semantic segmentation backbone used.

#### References

- [1] Christopher Choy, JunYoung Gwak, and Silvio Savarese. 4d spatio-temporal convnets: Minkowski convolutional neural networks. In *Proceedings of the IEEE/CVF Conference on Computer Vision and Pattern Recognition*, pages 3075–3084, 2019. 2, 3
- [2] Benjamin Graham, Martin Engelcke, and Laurens Van Der Maaten. 3d semantic segmentation with submanifold sparse convolutional networks. In *Proceedings of the IEEE conference on computer vision and pattern recognition*, pages 9224–9232, 2018. 2, 3
- [3] Lei Han, Tian Zheng, Lan Xu, and Lu Fang. Occuseg: Occupancy-aware 3d instance segmentation. In *Proceedings of the IEEE/CVF conference on computer vision and pattern recognition*, pages 2940–2949, 2020. 3
- [4] Wenxuan Wu, Zhongang Qi, and Li Fuxin. Pointconv: Deep convolutional networks on 3d point clouds. In *Proceedings of the IEEE/CVF Conference on Computer Vision and Pattern Recognition*, pages 9621–9630, 2019. 2, 3
